# Supplementary material
Source: Springer Nature journal article supplement (https://www.springermedizin.de/resource/supplementary/12884_2013_885_MOESM2_ESM.pdf/9458402)

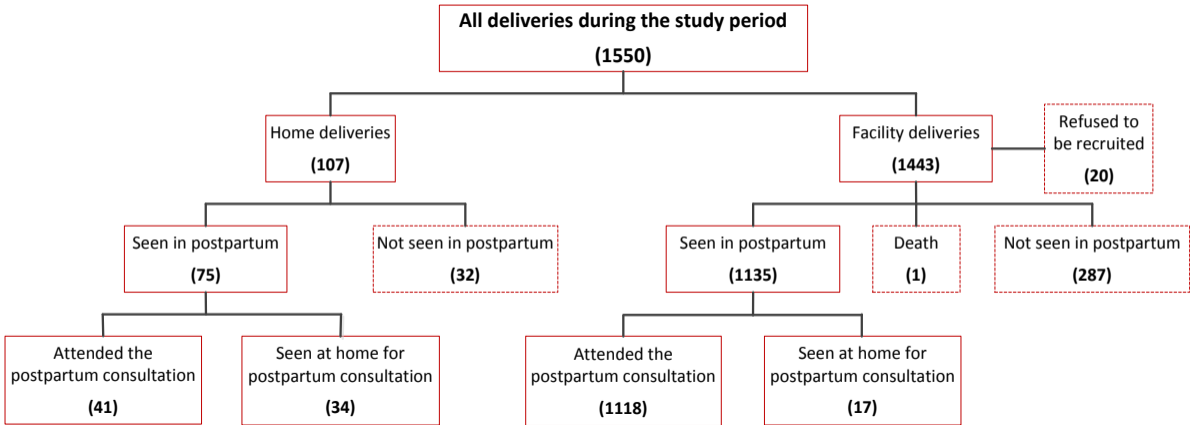

Supplement: MOESM2 [file 9458402]
